# Supplementary material for: Violent Partners or a Specific Class of Offenders? A Criminal Career Approach to Understanding Men Involved in Intimate Partner Sexual Violence
Source: PubMed Central journal article supplement (PMC11731407; doi:10.1177/10790632231224356), 2023-12-27
Supplement: sj-pdf-1-sax-10.1177_10790632231224356.pdf [file sj-pdf-1-sax-10.1177_10790632231224356.pdf]

## Appendix

Appendix 1. Multicollinearity diagnosis (N=44,932)

|                                                  | Tolerance | VIF  |
|--------------------------------------------------|-----------|------|
| Number of homicides                              | 0.82      | 1.23 |
| Number of liberty violation offences             | 0.87      | 1.15 |
| Number of violent offences                       | 0.62      | 1.62 |
| Number of property offences                      | 0.59      | 1.70 |
| Number of condition breaches                     | 0.39      | 2.56 |
| Number of drug offences                          | 0.68      | 1.46 |
| Number of sexual offences (non-domestic context) | 0.97      | 1.04 |
| Number of other offences                         | 0.60      | 1.68 |
| Variety                                          | 0.50      | 1.99 |
| Lambda                                           | 0.74      | 1.35 |
| Average gravity score                            | 0.81      | 1.24 |
| Age at the first criminal event                  | 0.89      | 1.13 |

Appendix 2. ROC curve of binary logistic regression model (N=44,932)

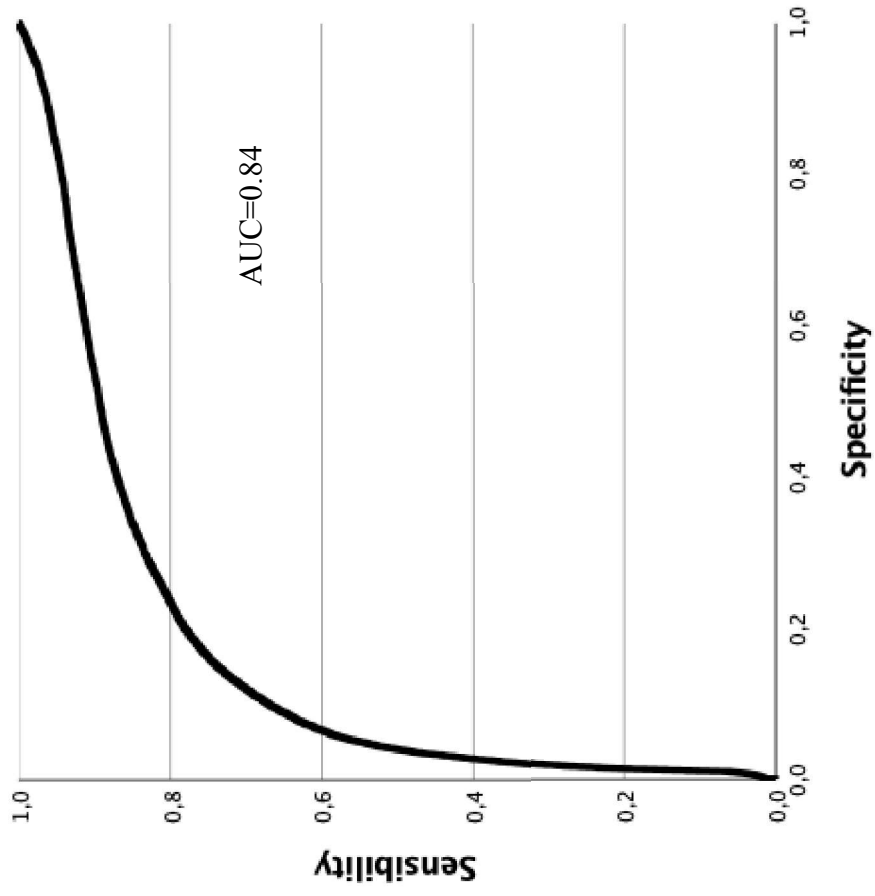

Appendix 3. Fit indices for latent profiles (N=44,932)

| Nb of profiles   | LL               | BIC(LL)           | AIC(LL)           | Adjusted BIC      | VLMR             | p-value           | Entropy R <sup>2</sup> |
|------------------|------------------|-------------------|-------------------|-------------------|------------------|-------------------|------------------------|
| 1-Cluster        | -156355.61       | 312881.16         | 312747.23         | 312823.96         |                  |                   | 1.00                   |
| 2-Cluster        | 48747.67         | -97146.02         | -97421.34         | -97263.60         | 410206.57        | < 0.001           | 0.99                   |
| 3-Cluster        | 134664.37        | -268800.05        | -269216.75        | -268978.01        | 171833.41        | < 0.001           | 0.99                   |
| <b>4-Cluster</b> | <b>200837.61</b> | <b>-400429.00</b> | <b>-401411.22</b> | <b>-400848.48</b> | <b>108911.83</b> | <b>&lt; 0.001</b> | <b>0.99</b>            |
| 5-Cluster        | 185404.29        | -369921.12        | -370620.58        | -370219.84        | 55564.43         | < 0.001           | 0.99                   |
| 6-Cluster        | 173055.39        | -345043.95        | -345884.78        | -345403.05        | -24697.79        | 2.06              | 0.98                   |
| 7-Cluster        | 130948.37        | -261188.66        | -261746.74        | -261427.01        | -7432.00         | 1.00              | 0.98                   |

Note: Boldface type indicates the selected model

Vuong-Lo-Mendel-Rubin likelihood ratio test not applicable for one-class model
